# Supplementary material for: From basic physics to mechanisms of toxicity: the “liquid drop” approach applied to develop predictive classification models for toxicity of metal oxide nanoparticles
Source: Royal Society of Chemistry journal article supplement (doi:10.1039/c4nr03487b), 2014-01-01

## Supplementary information

### **From Basic Physics to Mechanisms of Toxicity: “Liquid Drop” Approach Applied to Develop Predictive Classification Models for Toxicity of Metal Oxide Nanoparticles**

Natalia Novoselska,<sup>a,b</sup> Bakhtiyor Rasulev,<sup>b</sup> Agnieszka Gajewicz,<sup>c</sup> Victor Kuz'min,<sup>a,d</sup> Tomasz Puzyn<sup>c</sup> and Jerzy Leszczynski<sup>b\*</sup>

<sup>a</sup>*I.I.Mechnikov Odessa National University, Department of Chemistry, Dvoryanskaya str., 2, 65082, Odessa, Ukraine*

<sup>b</sup>*Interdisciplinary Center for Nanotoxicity, Department of Chemistry, Jackson State University, 1400 J. R. Lynch Street, P. O. Box 17910, Jackson, MS 39217, USA*

<sup>c</sup>*Laboratory of Environmental Chemometrics, Faculty of Chemistry, University of Gdansk, Wita Stwosza 64, 80-308 Gdansk, Poland*

<sup>d</sup>*A.V. Bogatsky Physical-Chemical Institute National Academy of Sciences of Ukraine, 65080, Odessa, Ukraine*

Table S1. Specifications of developed model for toxicity towards *E.coli*

| Compound                       | Observed values<br>log (1/EC <sub>50</sub> ) | Predicted values<br>log (1/EC <sub>50</sub> ) | Predicted standard deviation<br>log (1/EC <sub>50</sub> ) | Set      |
|--------------------------------|----------------------------------------------|-----------------------------------------------|-----------------------------------------------------------|----------|
| ZrO <sub>2</sub>               | 2.150                                        | 1.902                                         | 0.148                                                     | test     |
| NiO                            | 3.450                                        | 3.242                                         | 0.368                                                     | test     |
| Sb <sub>2</sub> O <sub>3</sub> | 2.640                                        | 2.956                                         | 0.382                                                     | test     |
| Al <sub>2</sub> O <sub>3</sub> | 2.490                                        | 2.570                                         | 0.168                                                     | training |
| Bi <sub>2</sub> O <sub>3</sub> | 2.820                                        | 2.850                                         | 0.027                                                     | training |
| SnO <sub>2</sub>               | 2.010                                        | 1.902                                         | 0.148                                                     | training |
| TiO <sub>2</sub>               | 1.740                                        | 1.832                                         | 0.206                                                     | training |
| V <sub>2</sub> O <sub>3</sub>  | 3.140                                        | 2.888                                         | 0.345                                                     | training |
| Y <sub>2</sub> O <sub>3</sub>  | 2.870                                        | 2.870                                         | 0.000                                                     | training |
| CoO                            | 3.510                                        | 3.370                                         | 0.313                                                     | training |
| Cr <sub>2</sub> O <sub>3</sub> | 2.510                                        | 2.538                                         | 0.209                                                     | training |
| Fe <sub>2</sub> O <sub>3</sub> | 2.290                                        | 2.378                                         | 0.120                                                     | training |
| In <sub>2</sub> O <sub>3</sub> | 2.810                                        | 2.822                                         | 0.027                                                     | training |
| La <sub>2</sub> O <sub>3</sub> | 2.870                                        | 2.87                                          | 0.000                                                     | training |
| SiO <sub>2</sub>               | 2.200                                        | 1.924                                         | 0.252                                                     | training |

Figure S1. Plot of experimentally determined (observed) versus predicted log values of 1/EC<sub>50</sub> for model of toxicity towards *E.coli*

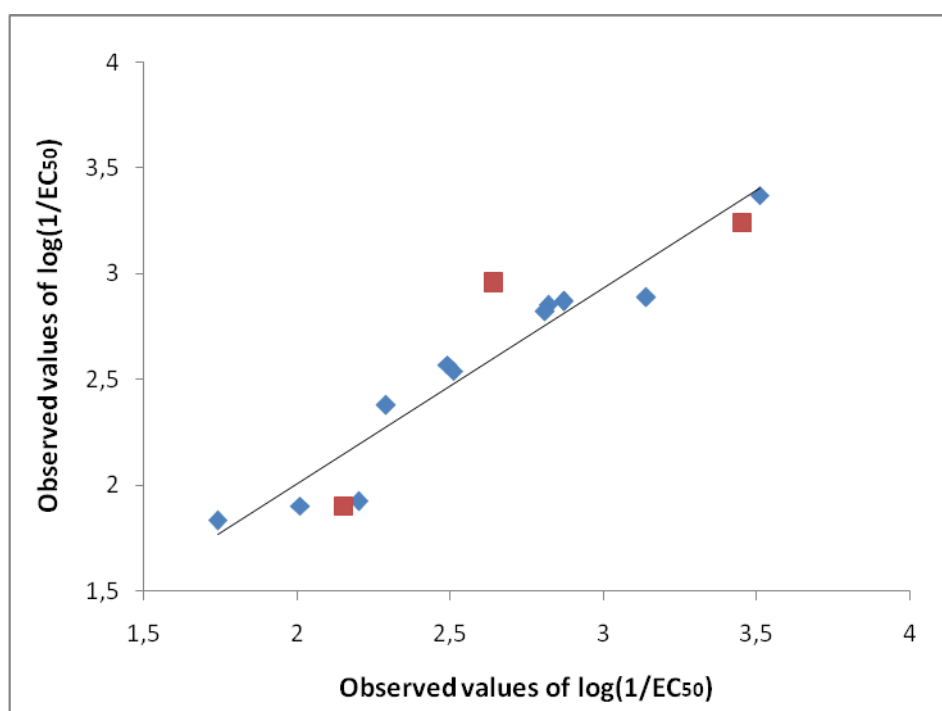

Table S2. Specifications of developed model for toxicity towards *HaCaT*

| Compound                       | Observed values<br>log (1/LC <sub>50</sub> ) | Predicted values<br>log (1/LC <sub>50</sub> ) | Predicted standard deviation<br>log (1/LC <sub>50</sub> ) | Set      |
|--------------------------------|----------------------------------------------|-----------------------------------------------|-----------------------------------------------------------|----------|
| ZrO <sub>2</sub>               | 2.020                                        | 2.110                                         | 0.066                                                     | test     |
| CoO                            | 2.830                                        | 2.786                                         | 0.493                                                     | test     |
| Cr <sub>2</sub> O <sub>3</sub> | 2.300                                        | 2.160                                         | 0.073                                                     | test     |
| Al <sub>2</sub> O <sub>3</sub> | 1.850                                        | 1.912                                         | 0.131                                                     | training |
| Bi <sub>2</sub> O <sub>3</sub> | 2.500                                        | 2.534                                         | 0.076                                                     | training |
| SiO <sub>2</sub>               | 2.120                                        | 1.962                                         | 0.187                                                     | training |
| SnO <sub>2</sub>               | 2.670                                        | 2.544                                         | 0.201                                                     | training |
| TiO <sub>2</sub>               | 1.760                                        | 1.818                                         | 0.130                                                     | training |
| WO <sub>3</sub>                | 2.560                                        | 2.560                                         | 0.000                                                     | training |
| Y <sub>2</sub> O <sub>3</sub>  | 2.210                                        | 2.146                                         | 0.088                                                     | training |
| ZnO                            | 3.320                                        | 3.118                                         | 0.452                                                     | training |
| Fe <sub>2</sub> O <sub>3</sub> | 2.050                                        | 2.082                                         | 0.072                                                     | training |
| In <sub>2</sub> O <sub>3</sub> | 2.920                                        | 2.816                                         | 0.178                                                     | training |
| La <sub>2</sub> O <sub>3</sub> | 2.870                                        | 2.880                                         | 0.022                                                     | training |
| Mn <sub>2</sub> O <sub>3</sub> | 2.640                                        | 2.510                                         | 0.178                                                     | training |
| NiO                            | 2.490                                        | 2.490                                         | 0.000                                                     | training |
| Sb <sub>2</sub> O <sub>3</sub> | 2.310                                        | 2.388                                         | 0.533                                                     | training |

Figure S2. Plot of experimentally determined (observed) versus predicted log values of 1/LC<sub>50</sub> for model of toxicity towards *HaCaT*

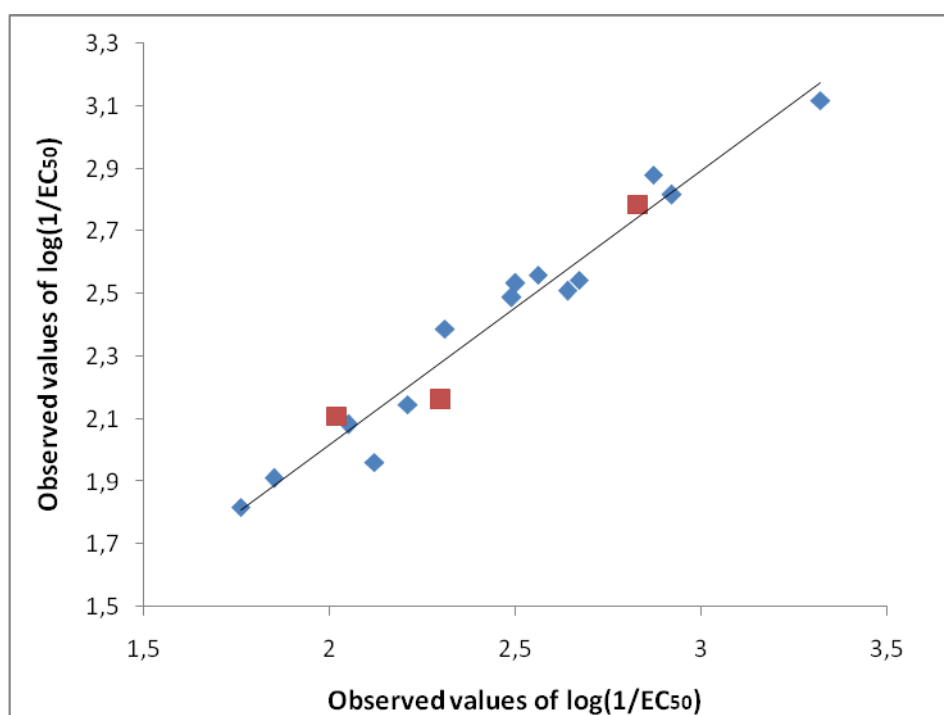

Supplement: c4nr03487b1.pdf [file c4nr03487b1.pdf]
